# Supplementary material for: Taxonomic revision of the Malagasy members of the Nesomyrmex angulatus species group using the automated morphological species delineation protocol NC-PART-clustering
Source: PeerJ. 2016 Mar 10;4:e1796. doi: 10.7717/peerj.1796 (PMC4793320; doi:10.7717/peerj.1796)
Supplement: Table S1 — Unique CASENT number for pinned samples, locality, geographic coordinates (Latitude, Longitude) in decimal format, altitude (Elevation) in meters a.s.l., collector’s name, date and number of specimens investigated bearing the given CASENT number are provided. HT, Holotype; PT, paratype(s). [file peerj-04-1796-s001.xls]

## Sheet: All_Malagasy_Nesomyrmex
Name on dendrogram	examined	Country	LocalityName	CollectedBy	DateCollected	DateCollEnd	Habitat	Microhabitat	Elevation(m)	Latitude	Longitude	OwnedBy	LocatedAt
angulatus-concolor_ST	2	Kenya	Ile de Mombasa	Alluaud & Jeannel	1_10_1911							NHMB, Basel, Switzerland	NHMB
angulatus-ilgi_HT	1	Ethiopia	Harar	Ilg								MHNG, Geneva, Switzerland	MHNG
angulatus-angulatus_LT	1	Egypt	Sinai									NHMW, Vienna, Austria	NHMW
angulatus-CASENT_0132241	1	Mayotte	Dapani	B.L.Fisher et al.	11_27_2007	11_27_2007	mangrove, coastal scrub	on low vegetation	1 m	-12.9749	45.1618	CASC, San Francisco, CA, USA	CASC
angulatus-CASENT_0132259	1	Mayotte	Dapani	B.L.Fisher et al.	11_27_2007	11_27_2007	mangrove, coastal scrub	on low vegetation	1 m	-12.9749	45.1618	CASC, San Francisco, CA, USA	CASC
angulatus-CASENT_0132265	1	Mayotte	Dapani	B.L.Fisher et al.	11_27_2007	11_27_2007	mangrove, coastal scrub	on low vegetation	1 m	-12.9749	45.1618	CASC, San Francisco, CA, USA	CASC
angulatus-CASENT_0132267	1	Mayotte	Dapani	B.L.Fisher et al.	11_27_2007	11_27_2007	mangrove, coastal scrub	on low vegetation	1 m	-12.9749	45.1618	CASC, San Francisco, CA, USA	CASC
angulatus-CASENT_0132551	1	Mayotte	Reserve forestiére Sohoa	B.L.Fisher et al.	12_1_2007	12_1_2007	coastal dry forest	ex dead twig above ground	10 m	-12.8124	45.1048	CASC, San Francisco, CA, USA	CASC
angulatus-CASENT_0132824	1	Mayotte	Reserve forestiére Sohoa	B.L.Fisher et al.	12_1_2007	12_1_2007	coastal dry forest	on low vegetation	10 m	-12.8124	45.1048	CASC, San Francisco, CA, USA	CASC
angulatus-CASENT_0132876	1	Mayotte	Petite Terre	B.L.Fisher et al.	12_4_2007	12_4_2007	coastal scrub degraded	on low vegetation	125 m	-12.7912	45.294	CASC, San Francisco, CA, USA	CASC
angulatus-CASENT_0134938	1	Mayotte	Baie de Tsingoni	B.L.Fisher et al.	11_26_2007	11_26_2007	mangrove, coastal scrub	on low vegetation	5 m	-12.7926	45.1076	CASC, San Francisco, CA, USA	CASC
angulatus-CASENT_0134949	2	Mayotte	Baie de Tsingoni	B.L.Fisher et al.	11_26_2007	11_26_2007	mangrove, coastal scrub	ex dead twig above ground	5 m	-12.7926	45.1076	CASC, San Francisco, CA, USA	CASC
angulatus-CASENT_0134952	2	Mayotte	Baie de Tsingoni	B.L.Fisher et al.	11_26_2007	11_26_2007	mangrove, coastal scrub	on low vegetation	5 m	-12.7926	45.1076	CASC, San Francisco, CA, USA	CASC
angulatus-CASENT_0137608	1	Madagascar	Taizambato, 22,9 km NE Ambanja	B.L.Fisher et al.	4_12_2008	4_12_2008	coconut plantation	on low vegetation	16 m	-13.5092	48.5672	CASC, San Francisco, CA, USA	CASC
angulatus-CASENT_0138073	1	Madagascar	Maropapango, 52.3 km N Antsohihy	B.L.Fisher et al.	4_10_2008	4_10_2008	mangrove	on low vegetation	18 m	-14.3204	48.0306	CASC, San Francisco, CA, USA	CASC
angulatus-CASENT_0146033	1	Comoros		B.L.Fisher et al.	1_28_2009	1_28_2009	coastal scrub	ex dead twig above ground	20 m	-12.3805	44.5022	CASC, San Francisco, CA, USA	CASC
angulatus-CASENT_0146051	1	Comoros		B.L.Fisher et al.	1_28_2009	1_28_2009	coastal scrub	ex dead branch above ground	20 m	-12.3805	44.5022	CASC, San Francisco, CA, USA	CASC
angulatus-CASENT_0146214	1	Comoros	Madahali 50	B.L.Fisher et al.	1_20_2009	1_20_2009	coastal dry forest scrub	ex dead twig above ground	50 m	-12.3742	43.8686	CASC, San Francisco, CA, USA	CASC
angulatus-CASENT_0146216	1	Comoros	Madahali 50	B.L.Fisher et al.	1_20_2009	1_20_2009	coastal dry forest scrub	on low vegetation	50 m	-12.3742	43.8686	CASC, San Francisco, CA, USA	CASC
angulatus-CASENT_0146227	1	Comoros	Madahali 50	B.L.Fisher et al.	1_20_2009	1_20_2009	coastal dry forest scrub	on low vegetation	50 m	-12.3742	43.8686	CASC, San Francisco, CA, USA	CASC
angulatus-CASENT_0146760	1	Comoros	Ouallah	B.L.Fisher et al.	1_17_2009	1_17_2009	coastal scrub	on low vegetation	10 m	-12.3272	43.6595	CASC, San Francisco, CA, USA	CASC
angulatus-CASENT_0146763	1	Comoros	Ouallah	B.L.Fisher et al.	1_17_2009	1_17_2009	coastal scrub	on low vegetation	10 m	-12.3272	43.6595	CASC, San Francisco, CA, USA	CASC
angulatus-CASENT_0147162	1	Comoros	Lac Boundouni	B.L.Fisher et al.	1_20_2009	1_20_2009	dry forest		25 m	-12.3791	43.8516	CASC, San Francisco, CA, USA	CASC
angulatus-CASENT_0147197	1	Comoros	Lac Boundouni	B.L.Fisher et al.	1_20_2009	1_20_2009	dry forest		25 m	-12.3791	43.8516	CASC, San Francisco, CA, USA	CASC
angulatus-CASENT_0147212	1	Comoros	Lac Boundouni	B.L.Fisher et al.	1_20_2009	1_20_2009	dry forest	on low vegetation	25 m	-12.3791	43.8516	CASC, San Francisco, CA, USA	CASC
angulatus-CASENT_0147217	1	Comoros	Lac Boundouni	B.L.Fisher et al.	1_20_2009	1_20_2009	dry forest	on low vegetation	25 m	-12.3791	43.8516	CASC, San Francisco, CA, USA	CASC
angulatus-CASENT_0147227	1	Comoros	Lac Boundouni	B.L.Fisher et al.	1_20_2009	1_20_2009	dry forest	ground forager(s)	25 m	-12.3791	43.8516	CASC, San Francisco, CA, USA	CASC
angulatus-CASENT_0147245	1	Comoros	Lac Boundouni	B.L.Fisher et al.	1_20_2009	1_20_2009	dry forest	ex dead twig above ground	25 m	-12.3791	43.8516	CASC, San Francisco, CA, USA	CASC
angulatus-CASENT_0147246	1	Comoros	Lac Boundouni	B.L.Fisher et al.	1_20_2009	1_20_2009	dry forest	ex dead twig above ground	25 m	-12.3791	43.8516	CASC, San Francisco, CA, USA	CASC
angulatus-CASENT_0178058	1	Mayotte	Baie de Tsingoni	B.L.Fisher et al.	11_26_2007	11_26_2007	mangrove, coastal scrub	ex dead twig above ground	5 m	-12.7926	45.1076	CASC, San Francisco, CA, USA	CASC
bidentatus-CASENT0486461HT	1	Madagascar	Parc National de Namoroka, 16.9 km 317° NW Vilanandro	Fisher, Griswold et al.	11_12_2002	11_16_2002	tropical dry forest	ex dead twig above ground	100 m	-16.4067	45.31	CASC, San Francisco, CA, USA	CASC
bidentatus-CASENT0746773PT	1	Madagascar	Parc National de Namoroka, 16.9 km 317° NW Vilanandro	Fisher, Griswold et al.	11_12_2002	11_16_2002	tropical dry forest	ex dead twig above ground	100 m	-16.4067	45.31	CASC, San Francisco, CA, USA	CASC
!bidentatus-CASENT_0054097	1	Madagascar	Rés. Analamerana, 16.7 km 123° Anivorano-Nord	B.L.Fisher	12_3_2004	00_00_00	tropical dry forest		225 m	-12.8047	49.3738	CASC, San Francisco, CA, USA	CASC
bidentatus-CASENT_0070846	1	Madagascar	Réserve Forestière d'Agnalazaha, Mahabo, 42.9 km 215° Farafangana	B.L. Fisher et al.	4_19_2006	00_00_00	littoral rainforest	ex dead twig above ground	20 m	-23.1938	47.723	CASC, San Francisco, CA, USA	CASC
bidentatus-CASENT0070916	1	Madagascar	Réserve Forestière d'Agnalazaha, Mahabo, 42.9 km 215° Farafangana	B.L. Fisher et al.	4_19_2006	00_00_00	littoral rainforest	ex dead twig above ground	20 m	-23.1938	47.723	CASC, San Francisco, CA, USA	CASC
bidentatus-CASENT0070933	2	Madagascar	Réserve Forestière d'Agnalazaha, Mahabo, 42.9 km 215° Farafangana	B.L. Fisher et al.	4_19_2006	00_00_00	littoral rainforest	ex dead twig above ground	20 m	-23.1938	47.723	CASC, San Francisco, CA, USA	CASC
bidentatus-CASENT0070952	1	Madagascar	Réserve Forestière d'Agnalazaha, Mahabo, 42.9 km 215° Farafangana	B.L. Fisher et al.	4_19_2006	00_00_00	littoral rainforest		20 m	-23.1938	47.723	CASC, San Francisco, CA, USA	CASC
bidentatus-CASENT0070972	2	Madagascar	Réserve Forestière d'Agnalazaha, Mahabo, 42.9 km 215° Farafangana	B.L. Fisher et al.	4_19_2006	00_00_00	littoral rainforest	ex dead twig above ground	20 m	-23.1938	47.723	CASC, San Francisco, CA, USA	CASC
bidentatus-CASENT0071587	1	Madagascar	Réserve Forestière d'Agnalazaha, Mahabo, 42.9 km 215° Farafangana	B.L. Fisher et al.	4_20_2006	00_00_00	littoral rainforest	ex dead twig above ground	20 m	-23.1938	47.723	CASC, San Francisco, CA, USA	CASC
bidentatus-CASENT0071593	1	Madagascar	Réserve Forestière d'Agnalazaha, Mahabo, 42.9 km 215° Farafangana	B.L. Fisher et al.	4_20_2006	00_00_00	littoral rainforest	ex dead twig above ground	20 m	-23.1938	47.723	CASC, San Francisco, CA, USA	CASC
bidentatus-CASENT0071597	1	Madagascar	Réserve Forestière d'Agnalazaha, Mahabo, 42.9 km 215° Farafangana	B.L. Fisher et al.	4_20_2006	00_00_00	littoral rainforest	ex dead twig above ground	20 m	-23.1938	47.723	CASC, San Francisco, CA, USA	CASC
bidentatus-CASENT0071723	1	Madagascar	Réserve Speciale Manombo 24.5 km 228° Farafangana	B.L. Fisher et al.	4_22_2006	00_00_00	rainforest	ex dead twig above ground	30 m	-23.0158	47.719	CASC, San Francisco, CA, USA	CASC
bidentatus-CASENT0107543	1	Madagascar	Nosy Be Airport, 10.3 km 30° Hell Ville	B.L.Fisher	12_11_2004	00_00_00	roadside	ex dead twig above ground	25 m	-13.3202	48.3108	CASC, San Francisco, CA, USA	CASC
bidentatus-CASENT0107544	1	Madagascar	Nosy Be Airport, 10.3 km 30° Hell Ville	B.L.Fisher	12_11_2004	00_00_00	roadside	ex dead twig above ground	25 m	-13.3202	48.3108	CASC, San Francisco, CA, USA	CASC
bidentatus-CASENT0107716	1	Madagascar	Forêt Ambato, 26.6 km 33° Ambanja	B.L.Fisher	12_9_2004	00_00_00	rainforest	ex rotten log	150 m	-13.4645	48.5517	CASC, San Francisco, CA, USA	CASC
bidentatus-CASENT0107720	1	Madagascar	Forêt Ambato, 26.6 km 33° Ambanja	B.L.Fisher	12_9_2004	00_00_00	rainforest	ex dead twig above ground	150 m	-13.4645	48.5517	CASC, San Francisco, CA, USA	CASC
bidentatus-CASENT0109618	1	Madagascar	Forêt Ambanitaza, 26.1 km 347° Antalaha	B.L.Fisher	11_27_2004	00_00_00	rainforest	ex dead twig above ground	240 m	-14.6793	50.1837	CASC, San Francisco, CA, USA	CASC
bidentatus-CASENT0121550	1	Madagascar	Forêt Mandena 8.5 km N Tolagnaro	B.L.Fisher et al.	12_5_2006	00_00_00	littoral rainforest	on low vegetation	20 m	-24.9527	47.0025	CASC, San Francisco, CA, USA	CASC
bidentatus-CASENT0127638	2	Madagascar	R.S. Manongarivo, 12.8 km 228° SW Antanambao	B.L.Fisher	10_12_1998	00_00_00	rainforest		780 m	-13.9767	48.4233	CASC, San Francisco, CA, USA	CASC
bidentatus-CASENT0136375	2	Madagascar	Réserve Nationale Intégrale Betampona, Betampona 35.1 km NW Toamasina	B.L.Fisher et al.	12_17_2007	12_17_2007	rainforest	ex dead twig above ground	500 m	-17.918	49.2007	CASC, San Francisco, CA, USA	CASC
bidentatus-CASENT0370586	1	Madagascar	Andranonatavy	Fisher, Griswold et al.	7_10_2013	8_10_2013	disturbed dry forest		275 m	-13.6648	47.987	CASC, San Francisco, CA, USA	CASC
bidentatus-CASENT0422700	2	Madagascar	Ampasindava, Forêt d'Ambilanivy, 3.9 km 181° S Ambaliha	Fisher, Griswold et al.	3_4_2001	3_9_2001	rainforest	ex dead twig above ground	600 m	-13.7986	48.1617	CASC, San Francisco, CA, USA	CASC
bidentatus-CASENT0422706	2	Madagascar	Ampasindava, Forêt d'Ambilanivy, 3.9 km 181° S Ambaliha	Fisher, Griswold et al.	3_4_2001	3_9_2001	rainforest	ex dead twig above ground	600 m	-13.7986	48.1617	CASC, San Francisco, CA, USA	CASC
bidentatus-CASENT0422712	1	Madagascar	Ampasindava, Forêt d'Ambilanivy, 3.9 km 181° S Ambaliha	Fisher, Griswold et al.	3_4_2001	3_9_2001	rainforest		600 m	-13.7986	48.1617	CASC, San Francisco, CA, USA	CASC
bidentatus-CASENT0422713	1	Madagascar	Ampasindava, Forêt d'Ambilanivy, 3.9 km 181° S Ambaliha	Fisher, Griswold et al.	3_4_2001	3_9_2001	rainforest		600 m	-13.7986	48.1617	CASC, San Francisco, CA, USA	CASC
bidentatus-CASENT0422715	1	Madagascar	Ampasindava, Forêt d'Ambilanivy, 3.9 km 181° S Ambaliha	Fisher, Griswold et al.	3_4_2001	3_9_2001	rainforest		600 m	-13.7986	48.1617	CASC, San Francisco, CA, USA	CASC
bidentatus-CASENT0422716	1	Madagascar	Ampasindava, Forêt d'Ambilanivy, 3.9 km 181° S Ambaliha	Fisher, Griswold et al.	3_4_2001	3_9_2001	rainforest		600 m	-13.7986	48.1617	CASC, San Francisco, CA, USA	CASC
bidentatus-CASENT0422719	2	Madagascar	Forêt d'Anabohazo, 21.6 km 247° WSW Maromandia	Fisher, Griswold et al.	3_11_2001	3_16_2001	tropical dry forest	on low vegetation	120 m	-14.3089	47.9143	CASC, San Francisco, CA, USA	CASC
bidentatus-CASENT0422738	1	Madagascar	Nosy Be, Réserve Naturelle Intégrale de Lokobe, 6.3 km 112° ESE Hellville	Fisher, Griswold et al.	3_19_2001	3_24_2001	rainforest		30 m	-13.4193	48.3312	CASC, San Francisco, CA, USA	CASC
bidentatus-CASENT0422739	1	Madagascar	Nosy Be, Réserve Naturelle Intégrale de Lokobe, 6.3 km 112° ESE Hellville	Fisher, Griswold et al.	3_19_2001	3_24_2001	rainforest		30 m	-13.4193	48.3312	CASC, San Francisco, CA, USA	CASC
bidentatus-CASENT0422748	1	Madagascar	Nosy Be, Réserve Naturelle Intégrale de Lokobe, 6.3 km 112° ESE Hellville	Fisher, Griswold et al.	3_19_2001	3_24_2001	rainforest		30 m	-13.4193	48.3312	CASC, San Francisco, CA, USA	CASC
bidentatus-CASENT0422751	1	Madagascar	Nosy Be, Réserve Naturelle Intégrale de Lokobe, 6.3 km 112° ESE Hellville	Fisher, Griswold et al.	3_19_2001	3_24_2001	rainforest		30 m	-13.4193	48.3312	CASC, San Francisco, CA, USA	CASC
bidentatus-CASENT0466572	1	Madagascar	Nosy Be, Réserve Naturelle Intégrale de Lokobe, 6.3 km 112° ESE Hellville	Fisher, Griswold et al.	3_19_2001	3_24_2001	rainforest	sifted litter (leaf mold, rotten wood)	30 m	-13.4193	48.3312	CASC, San Francisco, CA, USA	CASC
bidentatus-CASENT0486797	2	Madagascar	Parc National de Namoroka, 16.9 km 317° NW Vilanandro	Fisher, Griswold et al.	11_12_2002	11_16_2002	tropical dry forest	ex dead twig above ground	100 m	-16.4067	45.31	CASC, San Francisco, CA, USA	CASC
bidentatus-CASENT0489432	2	Madagascar	Réserve Spéciale de Bemarivo, 23.8 km 223° SW Besalampy	Fisher, Griswold et al.	11_19_2002	11_23_2002	tropical dry forest	ex dead twig above ground	30 m	-16.925	44.3683	CASC, San Francisco, CA, USA	CASC
bidentatus-CASENT0489433	2	Madagascar	Réserve Spéciale de Bemarivo, 23.8 km 223° SW Besalampy	Fisher, Griswold et al.	11_19_2002	11_23_2002	tropical dry forest	ex dead twig above ground	30 m	-16.925	44.3683	CASC, San Francisco, CA, USA	CASC
bidentatus-CASENT0491006	2	Madagascar	Réserve Spéciale de Bemarivo, 23.8 km 223° SW Besalampy	Fisher, Griswold et al.	11_19_2002	11_23_2002	tropical dry forest	ex dead twig above ground	30 m	-16.925	44.3683	CASC, San Francisco, CA, USA	CASC
bidentatus-CASENT0491021	2	Madagascar	Réserve Spéciale de Bemarivo, 23.8 km 223° SW Besalampy	Fisher, Griswold et al.	11_19_2002	11_23_2002	tropical dry forest	ex dead twig above ground	30 m	-16.925	44.3683	CASC, San Francisco, CA, USA	CASC
bidentatus-CASENT0491022	2	Madagascar	Réserve Spéciale de Bemarivo, 23.8 km 223° SW Besalampy	Fisher, Griswold et al.	11_19_2002	11_23_2002	tropical dry forest	ex dead twig above ground	30 m	-16.925	44.3683	CASC, San Francisco, CA, USA	CASC
bidentatus-MCZENT00576267	2	Madagascar	Nosy Be, 4 km ESE Andoany (=Hellville)	P.S.Ward	3_v_1989		rainforest edge	ex dead twig	100 m	-13.25	48.18	MCZ, Cambridge, MA, USA	MCZ
bidentatus-MCZENT00576269	2	Madagascar	Nosy Mangabe	P.S.Ward	23_04_1989		rainforest edge	ex dead twig	100 m	-15.5	49.7667	MCZ, Cambridge, MA, USA	MCZ
bidentatus-MCZENT00576271	2	Madagascar	Nosy Mangabe	P.S.Ward	23_04_1989		lowland forest	ex dead twig		-15.5	49.6667	MCZ, Cambridge, MA, USA	MCZ
bidentatus-MCZENT0576272	2	Madagascar	N.R.I. Andohahela, big cave.	G.D. Alpert	04_02_1993		tropical dry forest		250 m	-24.7614	46.7278	MCZ, Cambridge, MA, USA	MCZ
clypeatus-CASENT_0422552_HT	1	Madagascar	Réserve Spéciale de l'Ankarana, 22.9 km 224° SW Anivorano Nord	Fisher, Griswold et al.	2_10_2001	2_16_2001	tropical dry forest	on low vegetation	80 m	-12.9089	49.1098	CASC, San Francisco, CA, USA	CASC
clypeatus-CASENT_0422553_PT	1	Madagascar	Réserve Spéciale de l'Ankarana, 22.9 km 224° SW Anivorano Nord	Fisher, Griswold et al.	2_10_2001	2_16_2001	tropical dry forest	on low vegetation	80 m	-12.9089	49.1098	CASC, San Francisco, CA, USA	CASC
clypeatus-CASENT_0427944_PT	1	Madagascar	Réserve Spéciale de l'Ankarana, 22.9 km 224° SW Anivorano Nord	Fisher, Griswold et al.	2_10_2001	2_16_2001	tropical dry forest	on low vegetation	80 m	-12.9089	49.1098	CASC, San Francisco, CA, USA	CASC
clypeatus-CASENT_0427970_PT	1	Madagascar	Réserve Spéciale de l'Ankarana, 22.9 km 224° SW Anivorano Nord	Fisher, Griswold et al.	2_10_2001	2_16_2001	tropical dry forest	on low vegetation	80 m	-12.9089	49.1098	CASC, San Francisco, CA, USA	CASC
clypeatus-CASENT_0427971_PT	1	Madagascar	Réserve Spéciale de l'Ankarana, 22.9 km 224° SW Anivorano Nord	Fisher, Griswold et al.	2_10_2001	2_16_2001	tropical dry forest	on low vegetation	80 m	-12.9089	49.1098	CASC, San Francisco, CA, USA	CASC
clypeatus-CASENT_0110417	1	Madagascar	Rés. Analamerana, 28.4 km 99° Anivorano-Nord	B.L.Fisher	12_6_2004	00_00_00	tropical dry forest	on low vegetation	60 m	-12.7467	49.4948	CASC, San Francisco, CA, USA	CASC
clypeatus-CASENT_0110486	1	Madagascar	Rés. Analamerana, 28.4 km 99° Anivorano-Nord	B.L.Fisher	12_6_2004	00_00_00	tropical dry forest	on low vegetation	60 m	-12.7467	49.4948	CASC, San Francisco, CA, USA	CASC
clypeatus-CASENT_0110489	1	Madagascar	Rés. Analamerana, 28.4 km 99° Anivorano-Nord	B.L.Fisher	12_6_2004	00_00_00	tropical dry forest	on low vegetation	60 m	-12.7467	49.4948	CASC, San Francisco, CA, USA	CASC
clypeatus-CASENT_0371034	1	Madagascar	Antsaharengy	B.L.Fisher	22_10_2013		litoral forest		90 m	-12.9067	49.6606	CASC, San Francisco, CA, USA	CASC
clypeatus-CASENT_0371044	1	Madagascar	Antsaharengy	B.L.Fisher	22_10_2013		litoral forest		90 m	-12.9067	49.6606	CASC, San Francisco, CA, USA	CASC
clypeatus-CASENT_0373166	1	Madagascar	Ankarana		24_11_2013	27_11_2013	dry forest on tsingy			-12.9098	49.1106	CASC, San Francisco, CA, USA	CASC
clypeatus-MCZ_62679	1	Madagascar	Re. Ankarana, English Camp	B&V.Roth	24.viii.1992				170 m	-12.9094	49.11	MCZ, Cambridge, MA, USA	MCZ
devius-CASENT_0448820_HT	1	Madagascar	Mahafaly Plateau, 6.2 km 74° ENE Itampolo	Fisher-Griswold Arthropod Team	2_21_2002	2_25_2002	spiny forest/thicket	ex dead twig above ground	80 m	-24.6536	43.9967	CASC, San Francisco, CA, USA	CASC
devius-CASENT_0448823_PT	2	Madagascar	Mahafaly Plateau, 6.2 km 74° ENE Itampolo	Fisher-Griswold Arthropod Team	2_21_2002	2_25_2002	spiny forest/thicket	ex dead twig above ground	80 m	-24.6536	43.9967	CASC, San Francisco, CA, USA	CASC
devius-CASENT_0448824_PT	2	Madagascar	Mahafaly Plateau, 6.2 km 74° ENE Itampolo	Fisher-Griswold Arthropod Team	2_21_2002	2_25_2002	spiny forest/thicket	ex dead twig above ground	80 m	-24.6536	43.9967	CASC, San Francisco, CA, USA	CASC
devius-CASENT_0448825_PT	2	Madagascar	Mahafaly Plateau, 6.2 km 74° ENE Itampolo	Fisher-Griswold Arthropod Team	2_21_2002	2_25_2002	spiny forest/thicket	ex dead twig above ground	80 m	-24.6536	43.9967	CASC, San Francisco, CA, USA	CASC
devius-CASENT_0746772_PT	2	Madagascar	Mahafaly Plateau, 6.2 km 74° ENE Itampolo	Fisher-Griswold Arthropod Team	2_21_2002	2_25_2002	spiny forest/thicket	ex dead twig above ground	80 m	-24.6536	43.9967	CASC, San Francisco, CA, USA	CASC
devius-CASENT_0016290	1	Madagascar	Mahafaly Plateau, 6.2 km 74° ENE Itampolo	Fisher-Griswold Arthropod Team	2_21_2002	2_25_2002	spiny forest/thicket	sifted litter (leaf mold, rotten wood)	80 m	-24.6536	43.9967	CASC, San Francisco, CA, USA	CASC
devius-CASENT_0019716	2	Madagascar	Réserve Spéciale de Cap Sainte Marie, 12.3 km 262° W Marovato	Fisher-Griswold Arthropod Team	2_11_2002	2_15_2002	spiny forest/thicket	sifted litter (leaf mold, rotten wood)	200 m	-25.5817	45.1683	CASC, San Francisco, CA, USA	CASC
devius-CASENT_0418722	2	Madagascar	Mahafaly Plateau, 6.2 km 74° ENE Itampolo	Fisher-Griswold Arthropod Team	2_21_2002	2_25_2002	spiny forest/thicket		80 m	-24.6536	43.9967	CASC, San Francisco, CA, USA	CASC
devius-CASENT_0418725	2	Madagascar	Mahafaly Plateau, 6.2 km 74° ENE Itampolo	Fisher-Griswold Arthropod Team	2_21_2002	2_25_2002	spiny forest/thicket		80 m	-24.6536	43.9967	CASC, San Francisco, CA, USA	CASC
devius-CASENT_0418726	2	Madagascar	Mahafaly Plateau, 6.2 km 74° ENE Itampolo	Fisher-Griswold Arthropod Team	2_21_2002	2_25_2002	spiny forest/thicket		80 m	-24.6536	43.9967	CASC, San Francisco, CA, USA	CASC
devius-CASENT_0447152	1	Madagascar	Parc National de Tsimanampetsotsa, 6.7 km 130° SE Efoetse, 23.0 km 175° S Beheloka	Fisher-Griswold Arthropod Team	3_18_2002	3_22_2002	spiny forest/thicket		25 m	-24.1006	43.76	CASC, San Francisco, CA, USA	CASC
devius-CASENT_0447153	1	Madagascar	Parc National de Tsimanampetsotsa, 6.7 km 130° SE Efoetse, 23.0 km 175° S Beheloka	Fisher-Griswold Arthropod Team	3_18_2002	3_22_2002	spiny forest/thicket		25 m	-24.1006	43.76	CASC, San Francisco, CA, USA	CASC
devius-CASENT_0447342	1	Madagascar	Forêt de Tsinjoriaky, 6.2 km 84° E Tsifota	Fisher-Griswold Arthropod Team	3_6_2002	3_10_2002	spiny forest/thicket		70 m	-22.8022	43.4207	CASC, San Francisco, CA, USA	CASC
devius-CASENT_0455476	2	Madagascar	Parc National de Tsimanampetsotsa, Mitoho Cave, 6.4 km 77° ENE Efoetse, 17.4 km 170° S Beheloka	Fisher-Griswold Arthropod Team	3_18_2002	3_22_2002	spiny forest/thicket	ex dead twig above ground	40 m	-24.0472	43.7532	CASC, San Francisco, CA, USA	CASC
devius-CASENT_0455477	2	Madagascar	Parc National de Tsimanampetsotsa, Mitoho Cave, 6.4 km 77° ENE Efoetse, 17.4 km 170° S Beheloka	Fisher-Griswold Arthropod Team	3_18_2002	3_22_2002	spiny forest/thicket	ex dead twig above ground	40 m	-24.0472	43.7532	CASC, San Francisco, CA, USA	CASC
devius-CASENT_0455609	2	Madagascar	Parc National de Tsimanampetsotsa, Mitoho Cave, 6.4 km 77° ENE Efoetse, 17.4 km 170° S Beheloka	Fisher-Griswold Arthropod Team	3_18_2002	3_22_2002	spiny forest/thicket	ex dead twig above ground	40 m	-24.0472	43.7532	CASC, San Francisco, CA, USA	CASC
exiguus-CASENT_0077581_HT	1	Madagascar	Forêt d' Antsahabe, 11.4km 275° W Daraina	B.L.Fisher	12_13_2003	00_00_00	tropical dry forest	ex dead twig above ground	550 m	-13.2117	49.5567	CASC, San Francisco, CA, USA	CASC
exiguus-CASENT_0077626_PT	2	Madagascar	Forêt d' Antsahabe, 11.4km 275° W Daraina	B.L.Fisher	12_13_2003	00_00_00	tropical dry forest	ex dead twig above ground	550 m	-13.2117	49.5567	CASC, San Francisco, CA, USA	CASC
exiguus-CASENT_0208857	1	Madagascar	Anja Reserve	B.L.Fisher et al.	12_14_2010	12_14_2010	rupicolous vegetation on granite outcrop	ex dead twig above ground	1085 m	-21.8536	46.849	CASC, San Francisco, CA, USA	CASC
exiguus-CASENT_0107508	1	Madagascar	Forêt d' Antsahabe, 11.4km 275° W Daraina	B.L.Fisher	11_16_2004	00_00_00	tropical dry forest	ex dead twig above ground	550 m	-13.2117	49.5567	CASC, San Francisco, CA, USA	CASC
exiguus-CASENT_0041049	1	Madagascar	Forêt d'Analabe, 30.0 km 72° ENE Daraina	B.L.Fisher	11_27_2003	00_00_00	littoral rainforest	sifted litter (leaf mold, rotten wood)	30 m	-13.0833	49.9083	CASC, San Francisco, CA, USA	CASC
exiguus-CASENT_0041050	1	Madagascar	Forêt d'Analabe, 30.0 km 72° ENE Daraina	B.L.Fisher	11_27_2003	00_00_00	littoral rainforest	sifted litter (leaf mold, rotten wood)	30 m	-13.0833	49.9083	CASC, San Francisco, CA, USA	CASC
exiguus-CASENT_0052465	1	Madagascar	Rés. Analamerana, 16.7 km 123° Anivorano-Nord	B.L.Fisher	12_4_2004	00_00_00	tropical dry forest	ex dead twig above ground	225 m	-12.8047	49.3738	CASC, San Francisco, CA, USA	CASC
exiguus-CASENT_0052466	1	Madagascar	Rés. Analamerana, 16.7 km 123° Anivorano-Nord	B.L.Fisher	12_4_2004	00_00_00	tropical dry forest	ex dead twig above ground	225 m	-12.8047	49.3738	CASC, San Francisco, CA, USA	CASC
exiguus-CASENT_0053838	1	Madagascar	Rés. Analamerana, 16.7 km 123° Anivorano-Nord	B.L.Fisher	12_4_2004	00_00_00	tropical dry forest		225 m	-12.8047	49.3738	CASC, San Francisco, CA, USA	CASC
exiguus-CASENT_0053945	2	Madagascar	Forêt d' Antsahabe, 11.4km 275° W Daraina	B.L.Fisher	11_16_2004	00_00_00	tropical dry forest	ex dead twig above ground	550 m	-13.2117	49.5567	CASC, San Francisco, CA, USA	CASC
exiguus-CASENT_0054430	1	Madagascar	Rés. Analamerana, 28.4 km 99° Anivorano-Nord	B.L.Fisher	38326	00/00/00	tropical dry forest	sifted litter (leaf mold, rotten wood)	60 m	-12.7467	49.4948	CASC, San Francisco, CA, USA	CASC
exiguus-CASENT_0076356	2	Madagascar	Forêt de Binara, 7.5 km 230° SW Daraina	B.L.Fisher	12_2_2003	00_00_00	tropical dry forest	ex dead twig above ground	375 m	-13.255	49.6167	CASC, San Francisco, CA, USA	CASC
exiguus-CASENT_0076726	2	Madagascar	Forêt d' Antsahabe, 11.4km 275° W Daraina	B.L.Fisher	12_13_2003	00_00_00	tropical dry forest		550 m	-13.2117	49.5567	CASC, San Francisco, CA, USA	CASC
exiguus-CASENT_0076886	2	Madagascar	Forêt d' Antsahabe, 11.4km 275° W Daraina	B.L.Fisher	12_13_2003	00_00_00	tropical dry forest	ex dead twig above ground	550 m	-13.2117	49.5567	CASC, San Francisco, CA, USA	CASC
exiguus-CASENT_0077585	2	Madagascar	Forêt d' Antsahabe, 11.4km 275° W Daraina	B.L.Fisher	12_13_2003	00_00_00	tropical dry forest	ex dead twig above ground	550 m	-13.2117	49.5567	CASC, San Francisco, CA, USA	CASC
exiguus-CASENT_0107448	1	Madagascar	Rés. Analamerana, 16.7 km 123° Anivorano-Nord	B.L.Fisher	12_4_2004	00_00_00	tropical dry forest	ex dead twig above ground	225 m	-12.8047	49.3738	CASC, San Francisco, CA, USA	CASC
exiguus-CASENT_0109691	2	Madagascar	Rés. Analamerana, 28.4 km 99° Anivorano-Nord	B.L.Fisher	12_6_2004	00_00_00	tropical dry forest	ex dead twig above ground	60 m	-12.7467	49.4948	CASC, San Francisco, CA, USA	CASC
exiguus-CASENT_0110446	1	Madagascar	Rés. Analamerana, 28.4 km 99° Anivorano-Nord	B.L.Fisher	12_6_2004	00_00_00	tropical dry forest		60 m	-12.7467	49.4948	CASC, San Francisco, CA, USA	CASC
exiguus-CASENT_0110570	1	Madagascar	Rés. Analamerana, 28.4 km 99° Anivorano-Nord	B.L.Fisher	12_6_2004	00_00_00	tropical dry forest	ex dead twig above ground	60 m	-12.7467	49.4948	CASC, San Francisco, CA, USA	CASC
exiguus-CASENT_0110590	1	Madagascar	Rés. Analamerana, 28.4 km 99° Anivorano-Nord	B.L.Fisher	12_5_2004	00_00_00	tropical dry forest	ex dead twig above ground	60 m	-12.7467	49.4948	CASC, San Francisco, CA, USA	CASC
exiguus-CASENT_0110592	1	Madagascar	Rés. Analamerana, 28.4 km 99° Anivorano-Nord	B.L.Fisher	12_6_2004	00_00_00	tropical dry forest	ex dead twig above ground	60 m	-12.7467	49.4948	CASC, San Francisco, CA, USA	CASC
exiguus-CASENT_0110673	1	Madagascar	Ambondrobe, 41.1km 175° Vohemar	B.L.Fisher	11_30_2004	00_00_00	littoral rainforest	ex dead twig above ground	10 m	-13.7153	50.1017	CASC, San Francisco, CA, USA	CASC
exiguus-CASENT_0136046	1	Madagascar	Forêt d'Ampombofofo	B.L.Fisher et al.	11_21_2007	11_22_2007	littoral forest	ex dead twig above ground	25 m	-12.0995	49.3387	CASC, San Francisco, CA, USA	CASC
exiguus-CASENT_0136047	1	Madagascar	Forêt d'Ampombofofo	B.L.Fisher et al.	11_21_2007	11_22_2007	littoral forest	ex dead twig above ground	25 m	-12.0995	49.3387	CASC, San Francisco, CA, USA	CASC
exiguus-CASENT_0188864	1	Madagascar	Forêt de Bekaraoka, 6.8km 60° ENE Daraina	B.L.Fisher	12_7_2003	00_00_00	tropical dry forest	on low vegetation	150 m	-13.1667	49.71	CASC, San Francisco, CA, USA	CASC
exiguus-CASENT_0208857	1	Madagascar	Anja Reserve	B.L.Fisher et al.	12_14_2010	12_14_2010	rupicolous vegetation on granite outcrop	ex dead twig above ground	1085 m	-21.8536	46.849	CASC, San Francisco, CA, USA	CASC
exiguus-CASENT_0261284	1	Madagascar	Sakaramy	B.L.Fisher et al.	5_11_2011	5_11_2011	tropical dry forest	ex dead twig above ground	260 m	-12.4411	49.232	CASC, San Francisco, CA, USA	CASC
exiguus-CASENT_0422299	1	Madagascar	Réserve Spéciale de l'Ankarana, 13.6 km 192° SSW Anivorano Nord	Fisher, Griswold et al.	2_16_2001	2_21_2001	tropical dry forest	ex rotten stick on ground	210 m	-12.8636	49.2258	CASC, San Francisco, CA, USA	CASC
exiguus-CASENT_0422300	2	Madagascar	Réserve Spéciale de l'Ankarana, 13.6 km 192° SSW Anivorano Nord	Fisher, Griswold et al.	2_16_2001	2_21_2001	tropical dry forest	ex dead twig above ground	210 m	-12.8636	49.2258	CASC, San Francisco, CA, USA	CASC
exiguus-CASENT_0422560	1	Madagascar	Montagne des Français, 7.2 km 142° SE Antsiranana (=Diego Suarez)	Fisher, Griswold et al.	2_22_2001	2_28_2001	tropical dry forest		180 m	-12.3228	49.3382	CASC, San Francisco, CA, USA	CASC
exiguus-CASENT_0422561	1	Madagascar	Montagne des Français, 7.2 km 142° SE Antsiranana (=Diego Suarez)	Fisher, Griswold et al.	2_22_2001	2_28_2001	tropical dry forest		180 m	-12.3228	49.3382	CASC, San Francisco, CA, USA	CASC
exiguus-CASENT_0422565	1	Madagascar	Réserve Spéciale de l'Ankarana, 22.9 km 224° SW Anivorano Nord	Fisher, Griswold et al.	2_10_2001	2_16_2001	tropical dry forest		80 m	-12.9089	49.1098	CASC, San Francisco, CA, USA	CASC
exiguus-CASENT_0422566	1	Madagascar	Réserve Spéciale de l'Ankarana, 22.9 km 224° SW Anivorano Nord	Fisher, Griswold et al.	2_10_2001	2_16_2001	tropical dry forest		80 m	-12.9089	49.1098	CASC, San Francisco, CA, USA	CASC
exiguus-CASENT_0427939	2	Madagascar	Réserve Spéciale de l'Ankarana, 22.9 km 224° SW Anivorano Nord	Fisher, Griswold et al.	2_10_2001	2_16_2001	tropical dry forest	ex dead twig above ground	80 m	-12.9089	49.1098	CASC, San Francisco, CA, USA	CASC
exiguus-CASENT_0427975	1	Madagascar	Réserve Spéciale de l'Ankarana, 22.9 km 224° SW Anivorano Nord	Fisher, Griswold et al.	2_10_2001	2_16_2001	tropical dry forest	ex dead twig above ground	80 m	-12.9089	49.1098	CASC, San Francisco, CA, USA	CASC
exiguus-CASENT_0427976	1	Madagascar	Réserve Spéciale de l'Ankarana, 22.9 km 224° SW Anivorano Nord	Fisher, Griswold et al.	2_10_2001	2_16_2001	tropical dry forest	ex dead twig above ground	80 m	-12.9089	49.1098	CASC, San Francisco, CA, USA	CASC
exiguus-CASENT_0487512	2	Madagascar	Forêt d' Andavakoera, 21.4km 75° ENE Ambilobe; 4.6km 356° N Betsiaka	B.L.Fisher	12_16_2003	00_00_00	rainforest		425 m	-13.1183	49.23	CASC, San Francisco, CA, USA	CASC
exiguus-CASENT_0487514	2	Madagascar	Forêt d' Andavakoera, 21.4km 75° ENE Ambilobe; 4.6km 356° N Betsiaka	B.L.Fisher	12_16_2003	00_00_00	rainforest	ex dead twig above ground	425 m	-13.1183	49.23	CASC, San Francisco, CA, USA	CASC
exiguus-CASENT_0487515	2	Madagascar	Forêt d' Andavakoera, 21.4km 75° ENE Ambilobe; 4.6km 356° N Betsiaka	B.L.Fisher	12_16_2003	00_00_00	rainforest	ex dead twig above ground	425 m	-13.1183	49.23	CASC, San Francisco, CA, USA	CASC
exiguus-CASENT_0487562	2	Madagascar	Forêt d' Andavakoera, 21.4km 75° ENE Ambilobe; 4.6km 356° N Betsiaka	B.L.Fisher	12_16_2003	00_00_00	rainforest	ex dead twig above ground	425 m	-13.1183	49.23	CASC, San Francisco, CA, USA	CASC
exiguus-CASENT_0487563	2	Madagascar	Forêt d' Andavakoera, 21.4km 75° ENE Ambilobe; 4.6km 356° N Betsiaka	B.L.Fisher	12_16_2003	00_00_00	rainforest	ex dead twig above ground	425 m	-13.1183	49.23	CASC, San Francisco, CA, USA	CASC
exiguus-CASENT_0487666	2	Madagascar	Forêt d' Andavakoera, 21.4km 75° ENE Ambilobe; 4.6km 356° N Betsiaka	B.L.Fisher	12_16_2003	00_00_00	rainforest	ex dead twig above ground	425 m	-13.1183	49.23	CASC, San Francisco, CA, USA	CASC
exiguus-CASENT_0487684	2	Madagascar	Forêt d' Andavakoera, 21.4km 75° ENE Ambilobe; 4.6km 356° N Betsiaka	B.L.Fisher	12_16_2003	00_00_00	rainforest	ex dead twig above ground	425 m	-13.1183	49.23	CASC, San Francisco, CA, USA	CASC
exiguus-CASENT_0494361	2	Madagascar	Forêt de Bekaraoka, 6.8km 60° ENE Daraina	B.L.Fisher	12_8_2003	00_00_00	tropical dry forest	ex dead twig above ground	150 m	-13.1667	49.71	CASC, San Francisco, CA, USA	CASC
exiguus-CASENT_0494385	2	Madagascar	Forêt de Bekaraoka, 6.8km 60° ENE Daraina	B.L.Fisher	12_8_2003	00_00_00	tropical dry forest	ex dead twig above ground	150 m	-13.1667	49.71	CASC, San Francisco, CA, USA	CASC
exiguus-CASENT_0494388	2	Madagascar	Forêt de Bekaraoka, 6.8km 60° ENE Daraina	B.L.Fisher	12_8_2003	00_00_00	tropical dry forest	ex dead twig above ground	150 m	-13.1667	49.71	CASC, San Francisco, CA, USA	CASC
exiguus-CASENT_0494397	2	Madagascar	Forêt de Bekaraoka, 6.8km 60° ENE Daraina	B.L.Fisher	12_8_2003	00_00_00	tropical dry forest		150 m	-13.1667	49.71	CASC, San Francisco, CA, USA	CASC
exiguus-CASENT_0494439	2	Madagascar	Forêt de Bekaraoka, 6.8km 60° ENE Daraina	B.L.Fisher	12_7_2003	00_00_00	tropical dry forest	ex dead twig above ground	150 m	-13.1667	49.71	CASC, San Francisco, CA, USA	CASC
exiguus-CASENT_0494440	3	Madagascar	Forêt de Bekaraoka, 6.8km 60° ENE Daraina	B.L.Fisher	12_7_2003	00_00_00	tropical dry forest	ex dead twig above ground	150 m	-13.1667	49.71	CASC, San Francisco, CA, USA	CASC
exiguus-CASENT_0494486	2	Madagascar	Forêt de Bekaraoka, 6.8km 60° ENE Daraina	B.L.Fisher	12_8_2003	00_00_00	tropical dry forest	ex dead twig above ground	150 m	-13.1667	49.71	CASC, San Francisco, CA, USA	CASC
exiguus-CASENT_0498783	2	Madagascar	Forêt d'Ampondrabe, 26.3km 10° NNE Daraina	B.L.Fisher	12_10_2003	00_00_00	tropical dry forest	ex dead twig above ground	175 m	-12.97	49.7	CASC, San Francisco, CA, USA	CASC
exiguus-CASENT_0498837	2	Madagascar	Forêt d'Ampondrabe, 26.3km 10° NNE Daraina	B.L.Fisher	12_11_2003	00_00_00	tropical dry forest	ex dead twig above ground	175 m	-12.97	49.7	CASC, San Francisco, CA, USA	CASC
exiguus-MCZENT_00576262	2	Madagascar	Réserve Ankarana, English Camp	G.D. Alpert	23_08_1992			on low vegetation	170 m	-12.9094	49.11	MCZ, Cambridge, MA, USA	MCZ
exiguus-MCZENT_00576263	2	Madagascar	Réserve Ankarana, 7 km SSE Matsaborimanga	P.S.Ward	28_11_1990		tropical dry forest	ex dead twig	150 m	-12.9167	49.1	MCZ, Cambridge, MA, USA	MCZ
fragilis-CASENT_0421396_HT	1	Madagascar	Nosy Be, Réserve Naturelle Intégrale de Lokobe, 6.3 km 112° ESE Hellville	Fisher, Griswold et al.	3_19_2001	3_24_2001	rainforest	ex dead twig above ground	30 m	-13.4193	48.3312	CASC, San Francisco, CA, USA	CASC
fragilis-CASENT_0421395_PT	1	Madagascar	Nosy Be, Réserve Naturelle Intégrale de Lokobe, 6.3 km 112° ESE Hellville	Fisher, Griswold et al.	3_19_2001	3_24_2001	rainforest	ex dead twig above ground	30 m	-13.4193	48.3312	CASC, San Francisco, CA, USA	CASC
fragilis-CASENT_0421399_PT	2	Madagascar	Nosy Be, Réserve Naturelle Intégrale de Lokobe, 6.3 km 112° ESE Hellville	Fisher, Griswold et al.	3_19_2001	3_24_2001	rainforest	ex dead twig above ground	30 m	-13.4193	48.3312	CASC, San Francisco, CA, USA	CASC
fragilis-CASENT_0054201	1	Madagascar	Rés. Analamerana, 28.4 km 99° Anivorano-Nord	B.L.Fisher	12_5_2004	00_00_00	tropical dry forest	sifted litter (leaf mold, rotten wood)	60 m	-12.7467	49.4948	CASC, San Francisco, CA, USA	CASC
fragilis-CASENT_0054303	1	Madagascar	Rés. Analamerana, 28.4 km 99° Anivorano-Nord	B.L.Fisher	12_5_2004	00_00_00	tropical dry forest	sifted litter (leaf mold, rotten wood)	60 m	-12.7467	49.4948	CASC, San Francisco, CA, USA	CASC
fragilis-CASENT_0076207	1	Madagascar	Forêt de Binara, 7.5 km 230° SW Daraina	B.L.Fisher	12_2_2003	00_00_00	tropical dry forest		375 m	-13.255	49.6167	CASC, San Francisco, CA, USA	CASC
fragilis-CASENT_0076294	2	Madagascar	Forêt de Binara, 7.5 km 230° SW Daraina	B.L.Fisher	12_1_2003	00_00_00	tropical dry forest	ex dead twig above ground	375 m	-13.255	49.6167	CASC, San Francisco, CA, USA	CASC
fragilis-CASENT_0076296	2	Madagascar	Forêt de Binara, 7.5 km 230° SW Daraina	B.L.Fisher	12_1_2003	00_00_00	tropical dry forest	ex dead twig above ground	375 m	-13.255	49.6167	CASC, San Francisco, CA, USA	CASC
fragilis-CASENT_0076433	2	Madagascar	Forêt de Binara, 7.5 km 230° SW Daraina	B.L.Fisher	12_2_2003	00_00_00	tropical dry forest	ex dead twig above ground	375 m	-13.255	49.6167	CASC, San Francisco, CA, USA	CASC
fragilis-CASENT_0107056	1	Madagascar	Forêt Ambato, 26.6 km 33° Ambanja	B.L.Fisher	12_9_2004	00_00_00	rainforest		150 m	-13.4645	48.5517	CASC, San Francisco, CA, USA	CASC
fragilis-CASENT_0107062	1	Madagascar	Forêt Ambato, 26.6 km 33° Ambanja	B.L.Fisher	12_10_2004	00_00_00	rainforest	ex dead twig above ground	150 m	-13.4645	48.5517	CASC, San Francisco, CA, USA	CASC
fragilis-CASENT_0107147	1	Madagascar	Forêt Ambato, 26.6 km 33° Ambanja	B.L.Fisher	12_9_2004	00_00_00	rainforest	ex dead twig above ground	150 m	-13.4645	48.5517	CASC, San Francisco, CA, USA	CASC
fragilis-CASENT_0107935	1	Madagascar	Ambondrobe, 41.1km 175° Vohemar	B.L.Fisher	11_30_2004	00_00_00	littoral rainforest	ex dead twig above ground	10 m	-13.7153	50.1017	CASC, San Francisco, CA, USA	CASC
fragilis-CASENT_0110477	2	Madagascar	Rés. Analamerana, 28.4 km 99° Anivorano-Nord	B.L.Fisher	12_6_2004	00_00_00	tropical dry forest	ex dead twig above ground	60 m	-12.7467	49.4948	CASC, San Francisco, CA, USA	CASC
fragilis-CASENT_0110555	2	Madagascar	Rés. Analamerana, 16.7 km 123° Anivorano-Nord	B.L.Fisher	12_4_2004	00_00_00	tropical dry forest	ex dead twig above ground	225 m	-12.8047	49.3738	CASC, San Francisco, CA, USA	CASC
fragilis-CASENT_0134410	1	Madagascar	Réserve Spéciale Marotandrano, Marotandrano 48.3km S Mandritsara	B.L.Fisher et al.	12_7_2007	12_7_2007	transition humid forest	ex dead twig above ground	865 m	-16.2832	48.8144	CASC, San Francisco, CA, USA	CASC
fragilis-CASENT_0261249	1	Madagascar	Sakaramy	B.L.Fisher et al.	5_14_2011	5_14_2011	tropical dry forest	ex dead twig above ground	313 m	-12.4428	49.2326	CASC, San Francisco, CA, USA	CASC
fragilis-CASENT_0261251	1	Madagascar	Sakaramy	B.L.Fisher et al.	5_14_2011	5_14_2011	tropical dry forest	ex dead twig above ground	313 m	-12.4428	49.2326	CASC, San Francisco, CA, USA	CASC
fragilis-CASENT_0261342	1	Madagascar	Sakaramy	B.L.Fisher et al.	5_12_2011	5_12_2011	tropical dry forest	ex dead twig above ground	260 m	-12.4411	49.232	CASC, San Francisco, CA, USA	CASC
fragilis-CASENT_0367536	1	Madagascar	Galoko chain	B.L.Fisher et al.	10_10_2013	15_10_2013	rainforest		937 m	-13.6461	47.6773	CASC, San Francisco, CA, USA	CASC
fragilis-CASENT_0421388	2	Madagascar	Nosy Be, Réserve Naturelle Intégrale de Lokobe, 6.3 km 112° ESE Hellville	Fisher, Griswold et al.	3_19_2001	3_24_2001	rainforest	ex dead twig above ground	30 m	-13.4193	48.3312	CASC, San Francisco, CA, USA	CASC
fragilis-CASENT_0421392	2	Madagascar	Nosy Be, Réserve Naturelle Intégrale de Lokobe, 6.3 km 112° ESE Hellville	Fisher, Griswold et al.	3_19_2001	3_24_2001	rainforest	ex dead twig above ground	30 m	-13.4193	48.3312	CASC, San Francisco, CA, USA	CASC
fragilis-CASENT_0421400	1	Madagascar	Nosy Be, Réserve Naturelle Intégrale de Lokobe, 6.3 km 112° ESE Hellville	Fisher, Griswold et al.	3_19_2001	3_24_2001	rainforest	ex rotten stick on ground	30 m	-13.4193	48.3312	CASC, San Francisco, CA, USA	CASC
fragilis-CASENT_0422525	2	Madagascar	Réserve Spéciale d'Ambre, 3.5 km 235° SW Sakaramy	Fisher, Griswold et al.	1_26_2001	1_31_2001	tropical dry forest	ex dead twig above ground	325 m	-12.4689	49.2422	CASC, San Francisco, CA, USA	CASC
fragilis-CASENT_0422752	2	Madagascar	Réserve Spéciale d'Ambre, 3.5 km 235° SW Sakaramy	Fisher, Griswold et al.	1_26_2001	1_31_2001	tropical dry forest		325 m	-12.4689	49.2422	CASC, San Francisco, CA, USA	CASC
fragilis-CASENT_0422760	1	Madagascar	Ampasindava, Forêt d'Ambilanivy, 3.9 km 181° S Ambaliha	Fisher, Griswold et al.	3_4_2001	3_9_2001	rainforest		600 m	-13.7986	48.1617	CASC, San Francisco, CA, USA	CASC
fragilis-CASENT_0499419	2	Madagascar	Forêt d'Analabe, 30.0 km 72° ENE Daraina	B.L.Fisher	11_28_2003	00_00_00	littoral rainforest	ex dead twig above ground	30 m	-13.0833	49.9083	CASC, San Francisco, CA, USA	CASC
fragilis-CASENT_0499420	2	Madagascar	Forêt d'Analabe, 30.0 km 72° ENE Daraina	B.L.Fisher	11_28_2003	00_00_00	littoral rainforest	ex dead twig above ground	30 m	-13.0833	49.9083	CASC, San Francisco, CA, USA	CASC
fragilis-CASENT_0499437	2	Madagascar	Forêt d'Analabe, 30.0 km 72° ENE Daraina	B.L.Fisher	11_28_2003	00_00_00	littoral rainforest	ex dead twig above ground	30 m	-13.0833	49.9083	CASC, San Francisco, CA, USA	CASC
gracilis-CASENT_0107191_HT	1	Madagascar	Forêt Ambato, 26.6 km 33° Ambanja	B.L.Fisher	12_9_2004	00_00_00	rainforest	ex dead twig above ground	150 m	-13.4645	48.5517	CASC, San Francisco, CA, USA	CASC
gracilis-CASENT_0107026_PT	1	Madagascar	Forêt Ambato, 26.6 km 33° Ambanja	B.L.Fisher	12_10_2004	00_00_00	rainforest	ex dead twig above ground	150 m	-13.4645	48.5517	CASC, San Francisco, CA, USA	CASC
gracilis-CASENT_0107027_PT	1	Madagascar	Forêt Ambato, 26.6 km 33° Ambanja	B.L.Fisher	12_10_2004	00_00_00	rainforest	ex dead twig above ground	150 m	-13.4645	48.5517	CASC, San Francisco, CA, USA	CASC
gracilis-CASENT_0107710_PT	1	Madagascar	Forêt Ambato, 26.6 km 33° Ambanja	B.L.Fisher	12_9_2004	00_00_00	rainforest	ex rot pocket above ground	150 m	-13.4645	48.5517	CASC, San Francisco, CA, USA	CASC
gracilis-CASENT_0107038	1	Madagascar	Forêt Ambato, 26.6 km 33° Ambanja	B.L.Fisher	12_10_2004	00_00_00	rainforest	ground forager(s)	150 m	-13.4645	48.5517	CASC, San Francisco, CA, USA	CASC
gracilis-CASENT_0136051	1	Madagascar	Forêt d'Ampombofofo	B.L.Fisher et al.	11_21_2007	11_22_2007	littoral forest	on low vegetation	25 m	-12.0995	49.3387	CASC, San Francisco, CA, USA	CASC
gracilis-CASENT_0136105	1	Madagascar	Forêt d'Ampombofofo	B.L.Fisher et al.	11_21_2007	11_22_2007	littoral forest	ex dead twig above ground	25 m	-12.0995	49.3387	CASC, San Francisco, CA, USA	CASC
gracilis-CASENT_0136132	1	Madagascar	Forêt d'Ampombofofo	B.L.Fisher et al.	11_21_2007	11_22_2007	littoral forest	ex dead twig above ground	25 m	-12.0995	49.3387	CASC, San Francisco, CA, USA	CASC
gracilis-CASENT_0136133	1	Madagascar	Forêt d'Ampombofofo	B.L.Fisher et al.	11_21_2007	11_22_2007	littoral forest	ex dead twig above ground	25 m	-12.0995	49.3387	CASC, San Francisco, CA, USA	CASC
gracilis-CASENT_0195121	2	Madagascar	Nosy Be, 4 km ESE Andoany (=Hellville)	P.S.Ward	3_v_1989		rainforest edge	ex dead twig	100 m	-13.25	48.18	Phil Ward's coll.
gracilis-CASENT_0261230	1	Madagascar	Sakaramy	B.L.Fisher et al.	5_12_2011	5_12_2011	tropical dry forest	ex dead twig above ground	260 m	-12.4411	49.232	CASC, San Francisco, CA, USA	CASC
gracilis-CASENT_0261345	1	Madagascar	Sakaramy	B.L.Fisher et al.	5_12_2011	5_12_2011	tropical dry forest	ex dead twig above ground	260 m	-12.4411	49.232	CASC, San Francisco, CA, USA	CASC
gracilis-CASENT_0261348	1	Madagascar	Sakaramy	B.L.Fisher et al.	5_11_2011	5_11_2011	tropical dry forest	ex dead twig above ground	260 m	-12.4411	49.232	CASC, San Francisco, CA, USA	CASC
gracilis-CASENT_0422554	2	Madagascar	Montagne des Français, 7.2 km 142° SE Antsiranana (=Diego Suarez)	Fisher, Griswold et al.	2_22_2001	2_28_2001	tropical dry forest		180 m	-12.3228	49.3382	CASC, San Francisco, CA, USA	CASC
gracilis-CASENT_0422555	1	Madagascar	Montagne des Français, 7.2 km 142° SE Antsiranana (=Diego Suarez)	Fisher, Griswold et al.	2_22_2001	2_28_2001	tropical dry forest		180 m	-12.3228	49.3382	CASC, San Francisco, CA, USA	CASC
gracilis-CASENT_0422556	2	Madagascar	Montagne des Français, 7.2 km 142° SE Antsiranana (=Diego Suarez)	Fisher, Griswold et al.	2_22_2001	2_28_2001	tropical dry forest		180 m	-12.3228	49.3382	CASC, San Francisco, CA, USA	CASC
gracilis-CASENT_0422559	3	Madagascar	Montagne des Français, 7.2 km 142° SE Antsiranana (=Diego Suarez)	Fisher, Griswold et al.	2_22_2001	2_28_2001	tropical dry forest		180 m	-12.3228	49.3382	CASC, San Francisco, CA, USA	CASC
gracilis-CASENT_0422567	1	Madagascar	Forêt d'Orangea, 3.6 km 128° SE Remena	Fisher, Griswold et al.	2_22_2001	2_28_2001	littoral rainforest		90 m	-12.2589	49.3747	CASC, San Francisco, CA, USA	CASC
gracilis-CASENT_0498779	2	Madagascar	Forêt de Bekaraoka, 6.8km 60° ENE Daraina	B.L.Fisher	12_7_2003	00_00_00	tropical dry forest	ex dead twig above ground	150 m	-13.1667	49.71	CASC, San Francisco, CA, USA	CASC
gracilis-CASENT_0498780	3	Madagascar	Forêt d'Ampondrabe, 26.3km 10° NNE Daraina	B.L.Fisher	12_11_2003	00_00_00	tropical dry forest	ex dead twig above ground	175 m	-12.97	49.7	CASC, San Francisco, CA, USA	CASC
gracilis-CASENT_0498781	3	Madagascar	Forêt d'Ampondrabe, 26.3km 10° NNE Daraina	B.L.Fisher	12_11_2003	00_00_00	tropical dry forest	ex dead twig above ground	175 m	-12.97	49.7	CASC, San Francisco, CA, USA	CASC
gracilis-MCZENT_00576255	2	Madagascar	Nosy Be, 4 km ESE Andoany (=Hellville)	P.S.Ward	3_v_1989		rainforest edge	ex dead twig	100 m	-13.25	48.18	MCZ, Cambridge, MA, USA	MCZ
gracilis-MCZENT_00576256	2	Madagascar	Nosy Be, 4 km ESE Andoany (=Hellville)	P.S.Ward	3_v_1989		rainforest edge	ex dead twig	100 m	-13.25	48.18	MCZ, Cambridge, MA, USA	MCZ
gracilis-MCZENT_00576257	2	Madagascar	Nosy Be, 4 km ESE Andoany (=Hellville)	P.S.Ward	3_v_1989		rainforest edge	ex dead twig	100 m	-13.25	48.18	MCZ, Cambridge, MA, USA	MCZ
gracilis-MCZENT_00576259	2	Madagascar	ca. 5 km S of Sambava	W.L. Brown Jr., D.E. Brown	16_2_1977			hollow twig		-14.2945	50.1758	MCZ, Cambridge, MA, USA	MCZ
gracilis-MCZENT_00576260	2	Madagascar	ca. 5 km S of Sambava	W.L. Brown Jr., D.E. Brown	16_2_1977			hollow twig		-14.2945	50.1758	MCZ, Cambridge, MA, USA	MCZ
gracilis-MCZENT_00576261	2	Madagascar	ca. 5 km S of Sambava	W.L. Brown Jr., D.E. Brown	16_2_1977			hollow twig		-14.2945	50.1758	MCZ, Cambridge, MA, USA	MCZ
gracilis-MCZENT_00576264	1	Madagascar	Réserve Ankarana	G.D. Alpert	24_08_1992		tropical dry forest	beating high vegetation	150 m	-12.9311	49.1225	MCZ, Cambridge, MA, USA	MCZ
hirtellus-CASENT_0457484_HT	1	Madagascar	Forêt de Beroboka, 5.9 km 131° SE Ankidranoka	Fisher-Griswold Arthropod Team	3_12_2002	3_16_2002	tropical dry forest	ex dead twig above ground	80 m	-22.2331	43.3663	CASC, San Francisco, CA, USA	CASC
hirtellus-CASENT_0427066_PT	1	Madagascar	Forêt de Beroboka, 5.9 km 131° SE Ankidranoka	Fisher-Griswold Arthropod Team	3_12_2002	3_16_2002	tropical dry forest		80 m	-22.2331	43.3663	CASC, San Francisco, CA, USA	CASC
hirtellus-CASENT_0427067_PT	1	Madagascar	Forêt de Beroboka, 5.9 km 131° SE Ankidranoka	Fisher-Griswold Arthropod Team	3_12_2002	3_16_2002	tropical dry forest		80 m	-22.2331	43.3663	CASC, San Francisco, CA, USA	CASC
hirtellus-CASENT_0457597_PT	2	Madagascar	Forêt de Beroboka, 5.9 km 131° SE Ankidranoka	Fisher-Griswold Arthropod Team	3_12_2002	3_16_2002	tropical dry forest	ex dead twig above ground	80 m	-22.2331	43.3663	CASC, San Francisco, CA, USA	CASC
hirtellus-CASENT_0000948	1	Madagascar	Forêt de Tsimembo, 11.0 km 346° NNW Soatana	Fisher-Griswold Arthropod Team	11_21_2001	11_25_2001	tropical dry forest	ex dead twig above ground	50 m	-18.9953	44.4435	CASC, San Francisco, CA, USA	CASC
hirtellus-CASENT_0015512	1	Madagascar	Parc National de Kirindy Mite, 16.3 km 127° SE Belo sur Mer	Fisher-Griswold Arthropod Team	12_6_2001	12_10_2001	tropical dry forest	sifted litter (leaf mold, rotten wood)	80 m	-20.7953	44.147	CASC, San Francisco, CA, USA	CASC
hirtellus-CASENT_0021888	1	Madagascar	Parc National de Namoroka, 17.8 km 329° WNW Vilanandro	Fisher, Griswold et al.	11_8_2002	11_12_2002	tropical dry forest	sifted litter (leaf mold, rotten wood)	100 m	-16.3767	45.3267	CASC, San Francisco, CA, USA	CASC
hirtellus-CASENT_0051960	1	Madagascar	Manombo	Frontier Wilderness Project	5_19_2004	5_21_2004	dry forest, SC2	leaf litter	227 m	-22.8026	43.7651	CASC, San Francisco, CA, USA	CASC
hirtellus-CASENT_0052363	1	Madagascar	Ranobe	Frontier Project	4_25_2003	4_30_2003	spiny forest/thicket		30 m	-23.0405	43.6096	CASC, San Francisco, CA, USA	CASC
hirtellus-CASENT_0107130	1	Madagascar	Forêt Ambohimanga, 26.1 km 314° Mampikony	B.L.Fisher	12_13_2004	00_00_00	tropical dry forest	ex dead twig above ground	250 m	-15.9627	47.4382	CASC, San Francisco, CA, USA	CASC
hirtellus-CASENT_0107794	1	Madagascar	Forêt Ambohimanga, 26.1 km 314° Mampikony	B.L.Fisher	12_14_2004	00_00_00	tropical dry forest	ex rot pocket	250 m	-15.9627	47.4382	CASC, San Francisco, CA, USA	CASC
hirtellus-CASENT_0107819	1	Madagascar	Forêt Ambohimanga, 26.1 km 314° Mampikony	B.L.Fisher	12_14_2004	00_00_00	tropical dry forest	ex dead twig above ground	250 m	-15.9627	47.4382	CASC, San Francisco, CA, USA	CASC
hirtellus-CASENT_0122445	1	Madagascar	Kirindy, 47.3 km NE Morondava	B.L.Fisher et al.	6_7_2007	00_00_00	tropical dry forest	ex dead twig above ground	60 m	-20.0712	44.6655	CASC, San Francisco, CA, USA	CASC
hirtellus-CASENT_0122446	1	Madagascar	Kirindy, 47.3 km NE Morondava	B.L.Fisher et al.	6_7_2007	00_00_00	tropical dry forest	ex dead twig above ground	60 m	-20.0712	44.6655	CASC, San Francisco, CA, USA	CASC
hirtellus-CASENT_0128105	1	Madagascar	Kirindy, 47.3 km NE Morondava	B.L.Fisher et al.	6_7_2007	00_00_00	tropical dry forest	ex dead twig above ground	60 m	-20.0712	44.6655	CASC, San Francisco, CA, USA	CASC
hirtellus-CASENT_0128111	1	Madagascar	Kirindy, 47.3 km NE Morondava	B.L.Fisher et al.	6_6_2007	00_00_00	tropical dry forest	ex dead twig above ground	60 m	-20.0712	44.6655	CASC, San Francisco, CA, USA	CASC
hirtellus-CASENT_0156630	2	Madagascar	Réserve forestière Beanka, 50.2 km E Maintirano	B.L.Fisher et al.	10_21_2009	00_00_00	tropical dry forest on tsingy	ex dead twig above ground	250 m	-18.0265	44.0505	CASC, San Francisco, CA, USA	CASC
hirtellus-CASENT_0156721	1	Madagascar	Réserve forestière Beanka, 50.2 km E Maintirano	B.L.Fisher et al.	10_31_2009	00_00_00	tropical dry forest on tsingy	ex dead twig above ground	153 m	-17.8876	44.4727	CASC, San Francisco, CA, USA	CASC
hirtellus-CASENT_0156854	1	Madagascar	Réserve forestière Beanka, 50.7 km E Maintirano	B.L.Fisher et al.	10_30_2009	00_00_00	tropical dry forest on tsingy	on low vegetation	140 m	-17.8802	44.4688	CASC, San Francisco, CA, USA	CASC
hirtellus-CASENT_0156860	1	Madagascar	Réserve forestière Beanka, 50.7 km E Maintirano	B.L.Fisher et al.	10_29_2009	00_00_00	tropical dry forest on tsingy	ex dead twig above ground	140 m	-17.8802	44.4688	CASC, San Francisco, CA, USA	CASC
hirtellus-CASENT_0156886	1	Madagascar	Réserve forestière Beanka, 50.7 km E Maintirano	B.L.Fisher et al.	10_29_2009	00_00_00	tropical dry forest on tsingy	ex dead twig above ground	140 m	-17.8802	44.4688	CASC, San Francisco, CA, USA	CASC
hirtellus-CASENT_0418479	2	Madagascar	Forêt de Kirindy, 15.5 km 64° ENE Marofandilia	Fisher-Griswold Arthropod Team	11_28_2001	12_3_2001	tropical dry forest		100 m	-20.045	44.6622	CASC, San Francisco, CA, USA	CASC
hirtellus-CASENT_0418864	2	Madagascar	Forêt de Tsimembo, 8.7 km 336° NNW Soatana	Fisher-Griswold Arthropod Team	11_21_2001	11_25_2001	tropical dry forest		20 m	-19.0214	44.4407	CASC, San Francisco, CA, USA	CASC
hirtellus-CASENT_0430204	1	Madagascar	Parc National de Kirindy Mite, 16.3 km 127° SE Belo sur Mer	Fisher-Griswold Arthropod Team	12_6_2001	12_10_2001	tropical dry forest	ex dead twig above ground	80 m	-20.7953	44.147	CASC, San Francisco, CA, USA	CASC
hirtellus-CASENT_0430205	1	Madagascar	Parc National de Kirindy Mite, 16.3 km 127° SE Belo sur Mer	Fisher-Griswold Arthropod Team	12_6_2001	12_10_2001	tropical dry forest	ex dead twig above ground	80 m	-20.7953	44.147	CASC, San Francisco, CA, USA	CASC
hirtellus-CASENT_0430211	2	Madagascar	Parc National de Kirindy Mite, 16.3 km 127° SE Belo sur Mer	Fisher-Griswold Arthropod Team	12_6_2001	12_10_2001	tropical dry forest	ex dead twig above ground	80 m	-20.7953	44.147	CASC, San Francisco, CA, USA	CASC
hirtellus-CASENT_0430338	2	Madagascar	Parc National de Kirindy Mite, 16.3 km 127° SE Belo sur Mer	Fisher-Griswold Arthropod Team	12_6_2001	12_10_2001	tropical dry forest	ex dead twig above ground	80 m	-20.7953	44.147	CASC, San Francisco, CA, USA	CASC
hirtellus-CASENT_0430372	2	Madagascar	Parc National de Kirindy Mite, 16.3 km 127° SE Belo sur Mer	Fisher-Griswold Arthropod Team	12_6_2001	12_10_2001	tropical dry forest	ex dead twig above ground	80 m	-20.7953	44.147	CASC, San Francisco, CA, USA	CASC
hirtellus-CASENT_0437455	2	Madagascar	Parc National d'Ankarafantsika, Ampijoroa Station Forestière, 40 km 306° NW Andranofasika	Fisher, Griswold et al.	3_26_2001	4_1_2001	tropical dry forest	ex dead branch above ground	130 m	-16.3208	46.8107	CASC, San Francisco, CA, USA	CASC
hirtellus-CASENT_0437462/63	2	Madagascar	Parc National d'Ankarafantsika, Ampijoroa Station Forestière, 40 km 306° NW Andranofasika	Fisher, Griswold et al.	36976	36982	tropical dry forest	ex dead branch above ground	130 m	-16.3208	46.8107	CASC, San Francisco, CA, USA	CASC
hirtellus-CASENT_0441921	1	Madagascar	Forêt de Tsimembo, 8.7 km 336° NNW Soatana	Fisher-Griswold Arthropod Team	11_21_2001	11_25_2001	tropical dry forest	ex dead twig above ground	20 m	-19.0214	44.4407	CASC, San Francisco, CA, USA	CASC
hirtellus-CASENT_0441925	1	Madagascar	Forêt de Tsimembo, 8.7 km 336° NNW Soatana	Fisher-Griswold Arthropod Team	11_21_2001	11_25_2001	tropical dry forest	ex dead twig above ground	20 m	-19.0214	44.4407	CASC, San Francisco, CA, USA	CASC
hirtellus-CASENT_0441926	1	Madagascar	Forêt de Tsimembo, 8.7 km 336° NNW Soatana	Fisher-Griswold Arthropod Team	11_21_2001	11_25_2001	tropical dry forest	ex dead twig above ground	20 m	-19.0214	44.4407	CASC, San Francisco, CA, USA	CASC
hirtellus-CASENT_0441949	1	Madagascar	Forêt de Tsimembo, 8.7 km 336° NNW Soatana	Fisher-Griswold Arthropod Team	11_21_2001	11_25_2001	tropical dry forest	ex dead twig above ground	20 m	-19.0214	44.4407	CASC, San Francisco, CA, USA	CASC
hirtellus-CASENT_0441950	1	Madagascar	Forêt de Tsimembo, 8.7 km 336° NNW Soatana	Fisher-Griswold Arthropod Team	11_21_2001	11_25_2001	tropical dry forest	ex dead twig above ground	20 m	-19.0214	44.4407	CASC, San Francisco, CA, USA	CASC
hirtellus-CASENT_0444218	2	Madagascar	Forêt de Kirindy, 15.5 km 64° ENE Marofandilia	Fisher-Griswold Arthropod Team	11_28_2001	12_3_2001	tropical dry forest	ex dead twig above ground	100 m	-20.045	44.6622	CASC, San Francisco, CA, USA	CASC
hirtellus-CASENT_0444231	2	Madagascar	Forêt de Kirindy, 15.5 km 64° ENE Marofandilia	Fisher-Griswold Arthropod Team	11_28_2001	12_3_2001	tropical dry forest	ex dead twig above ground	100 m	-20.045	44.6622	CASC, San Francisco, CA, USA	CASC
hirtellus-CASENT_0444236	2	Madagascar	Forêt de Kirindy, 15.5 km 64° ENE Marofandilia	Fisher-Griswold Arthropod Team	11_28_2001	12_3_2001	tropical dry forest	ex dead twig above ground	100 m	-20.045	44.6622	CASC, San Francisco, CA, USA	CASC
hirtellus-CASENT_0444265	1	Madagascar	Forêt de Kirindy, 15.5 km 64° ENE Marofandilia	Fisher-Griswold Arthropod Team	11_28_2001	12_3_2001	tropical dry forest	ex dead twig above ground	100 m	-20.045	44.6622	CASC, San Francisco, CA, USA	CASC
hirtellus-CASENT_0444266	1	Madagascar	Forêt de Kirindy, 15.5 km 64° ENE Marofandilia	Fisher-Griswold Arthropod Team	11_28_2001	12_3_2001	tropical dry forest	ex dead twig above ground	100 m	-20.045	44.6622	CASC, San Francisco, CA, USA	CASC
hirtellus-CASENT_0446358	2	Madagascar	Parc National de Kirindy Mite, 16.3 km 127° SE Belo sur Mer	Fisher-Griswold Arthropod Team	12_6_2001	12_10_2001	tropical dry forest		80 m	-20.7953	44.147	CASC, San Francisco, CA, USA	CASC
hirtellus-CASENT_0457485	1	Madagascar	Forêt de Beroboka, 5.9 km 131° SE Ankidranoka	Fisher-Griswold Arthropod Team	3_12_2002	3_16_2002	tropical dry forest	ex dead twig above ground	80 m	-22.2331	43.3663	CASC, San Francisco, CA, USA	CASC
hirtellus-CASENT_0474739	1	Madagascar	Parc National de Namoroka, 9.8 km 300° WNW Vilanandro	Fisher, Griswold et al.	11_4_2002	11_8_2002	tropical dry forest		140 m	-16.4667	45.35	CASC, San Francisco, CA, USA	CASC
hirtellus-CASENT_0474740	1	Madagascar	Parc National de Namoroka, 9.8 km 300° WNW Vilanandro	Fisher, Griswold et al.	11_4_2002	11_8_2002	tropical dry forest		140 m	-16.4667	45.35	CASC, San Francisco, CA, USA	CASC
hirtellus-CASENT_0485260	2	Madagascar	Parc National de Baie de Baly, 12.4 km 337° NNW Soalala	Fisher, Griswold et al.	11_26_2002	11_30_2002	tropical dry forest		10 m	-16.01	45.265	CASC, San Francisco, CA, USA	CASC
hirtellus-CASENT_0485269	2	Madagascar	Parc National de Baie de Baly, 12.4 km 337° NNW Soalala	Fisher, Griswold et al.	11_26_2002	11_30_2002	tropical dry forest		10 m	-16.01	45.265	CASC, San Francisco, CA, USA	CASC
hirtellus-CASENT_0485444	1	Madagascar	Parc National de Namoroka, 17.8 km 329° WNW Vilanandro	Fisher, Griswold et al.	11_8_2002	11_12_2002	tropical dry forest		100 m	-16.3767	45.3267	CASC, San Francisco, CA, USA	CASC
hirtellus-CASENT_0485525	1	Madagascar	Parc National de Namoroka, 17.8 km 329° WNW Vilanandro	Fisher, Griswold et al.	11_8_2002	11_12_2002	tropical dry forest		100 m	-16.3767	45.3267	CASC, San Francisco, CA, USA	CASC
hirtellus-CASENT_0492220	2	Madagascar	Parc National de Baie de Baly, 12.4 km 337° NNW Soalala	Fisher, Griswold et al.	11_26_2002	11_30_2002	tropical dry forest	ex dead twig above ground	10 m	-16.01	45.265	CASC, San Francisco, CA, USA	CASC
hirtellus-CASENT_0492235	2	Madagascar	Parc National de Baie de Baly, 12.4 km 337° NNW Soalala	Fisher, Griswold et al.	11_26_2002	11_30_2002	tropical dry forest	ex dead twig above ground	10 m	-16.01	45.265	CASC, San Francisco, CA, USA	CASC
hirtellus-CASENT_0492276	2	Madagascar	Parc National de Baie de Baly, 12.4 km 337° NNW Soalala	Fisher, Griswold et al.	11_26_2002	11_30_2002	tropical dry forest	ex dead twig above ground	10 m	-16.01	45.265	CASC, San Francisco, CA, USA	CASC
hirtellus-CASENT_0496560	2	Madagascar	Mahavavy River, 6.2 km 145° SE Mitsinjo	Fisher, Griswold et al.	12_1_2002	12_5_2002	gallery forest	ex dead twig above ground	20 m	-16.0517	45.9083	CASC, San Francisco, CA, USA	CASC
hirtellus-CASENT_0496607	2	Madagascar	Mahavavy River, 6.2 km 145° SE Mitsinjo	Fisher, Griswold et al.	12_1_2002	12_5_2002	gallery forest	ex dead twig above ground	20 m	-16.0517	45.9083	CASC, San Francisco, CA, USA	CASC
hirtellus-CASENT_0496627	2	Madagascar	Mahavavy River, 6.2 km 145° SE Mitsinjo	Fisher, Griswold et al.	12_1_2002	12_5_2002	gallery forest	ex dead twig above ground	20 m	-16.0517	45.9083	CASC, San Francisco, CA, USA	CASC
